1

2

3

### **One-cell Doubling Evaluation by Living Arrays of Yeast, ODELAY!**

4

Thurston Herricks<sup>1</sup>, David J. Dilworth<sup>1</sup>, Fred D Mast<sup>1,2</sup>, Song Li<sup>1</sup>, Jennifer J. Smith<sup>1</sup>, Alexander V.

5

Ratushny<sup>1,2</sup>, and John D. Aitchison<sup>1,2</sup>

6

7

<sup>1</sup>Institute for Systems Biology, Seattle, WA 98109, <sup>2</sup>Center for Infectious Disease Research, Seattle, WA

8

98109

9

10

Running Title: One-cell Doubling Evaluation by Living Arrays of Yeast, ODELAY

11

Key words: growth rate, lag time, carrying capacity, fitness assessment, yeast

12

Word count: Intro/Results/Discussion 3011 words

13

Online Methods 1039 words

14

15

16

Corresponding Author:

17

John D. Aitchison, Institute for Systems Biology, 401 Terry Ave. N., Seattle, WA 98109.

18

Phone: (206) 732-1344, FAX: (206) 732-1299, E-mail: [john.aitchison@systemsbiology.org](mailto:john.aitchison@systemsbiology.org)

19

20

## ABSTRACT

21 Cell growth is a complex phenotype widely used in systems biology to gauge the impact of genetic and  
22 environmental perturbations. Due to the magnitude of genome-wide studies, resolution is often  
23 sacrificed in favor of throughput, creating a demand for scalable, time-resolved, quantitative methods of  
24 growth assessment. We present ODELAY (One-cell Doubling Evaluation by Living Arrays of Yeast), an  
25 automated and scalable growth analysis platform. High measurement density and single cell resolution  
26 provide a powerful tool for large-scale multiparameter growth analysis based on the modeling of  
27 microcolony expansion on solid media. Pioneered in yeast but applicable to other colony forming  
28 organisms, ODELAY extracts the three key growth parameters (lag time, doubling time, and carrying  
29 capacity) that define microcolony expansion from single cells, simultaneously permitting the assessment  
30 of population heterogeneity. The utility of ODELAY is illustrated using yeast mutants, revealing a  
31 spectrum of phenotypes arising from single and combinatorial growth parameter perturbations.

32

## INTRODUCTION

33 Growth is a well-established, sensitive metric of cellular fitness that is widely used to interrogate genetic  
34 and environmental interactions. The most basic models of microorganism population expansion over  
35 time consist of three distinct phases – lag phase, log phase and stationary phase (Monod, 1949). Each  
36 phase is defined by a specific parameter that uniquely contributes to overall fitness. Lag phase, defined  
37 by lag time, is the period after initial inoculation wherein little to no growth is observed. Following  
38 acclimation, the population enters log phase and expands exponentially at a constant, maximal rate  
39 defined by the doubling time. Finally, a rapid cessation of growth is observed as the population enters  
40 stationary phase, having reached its maximum attainable level defined by the carrying capacity. By  
41 virtue of its linear nature during exponential growth, the log plot of population number versus time has  
42 classically been employed to extract the three key growth parameters. Lag time is the period up to the

43 attainment of linearity of the log-plot, doubling time is inversely proportional to the slope of the linear  
44 region of the log-plot and carrying capacity is the maximum population size when the slope of the log  
45 plot approaches zero.

46 In light of its relatively well-understood cell biology and genetic tractability, baker's yeast,  
47 *Saccharomyces cerevisiae*, is a model organism commonly exploited to elucidate genetic and  
48 environmental interactions on a genome-wide scale. Many methods of assessing yeast strain growth  
49 characteristics have been described and most employ liquid culturing (Breslow et al., 2008; Bryan et al.,  
50 2010; Godin et al., 2010; Kortmann et al., 2009; Murakami and Kaeberlein, 2009; Sun et al., 2010; Tucker  
51 and Fields, 2004; Winzeler et al., 1999). These include direct measurements, such as cell counting and  
52 flow cytometry, and indirect measurements, the most common being the turbidity of the growth media  
53 measured by absorbance of 600 nm light ( $OD_{600}$ ). Dynamic range limitations associated with many of  
54 these methods render them unable to assess all three growth parameters within a single experimental  
55 run; thus, analyses are often restricted to only one growth parameter, most commonly doubling time.  
56 Furthermore, difficulties associated with maintaining low volume yeast cultures in suspension at high  
57 densities limit the throughput of many liquid growth analysis techniques (Kortmann et al., 2009).

58 The shortcomings inherent to yeast liquid culture analyses have made it commonplace to employ cell  
59 spotting as a proxy for strain growth. Cell spotting assays range from biofilm analysis, in which a  
60 population of cells is delivered as a patch onto the surface of solid media, to serial dilution analysis,  
61 wherein single colonies are obtained (Lawless et al., 2010; Memarian et al., 2007; Shah et al., 2007).  
62 While these methods are universally accepted, there are major caveats to their use. Foremost, despite  
63 the demonstration of dynamical growth assessment for populations of cells through the analysis of  
64 biofilm intensity on solid media (Shah et al., 2007), most large-scale fitness analyses are assessed from a  
65 single time point (Baryshnikova et al., 2010; Collins et al., 2006; Costanzo et al., 2010). The lack of

66 temporal resolution makes it impossible to deconvolve the different stages of population growth and,  
67 therefore, apparent differences in fitness cannot be unequivocally attributed to the classically defined  
68 growth parameters of doubling time, lag time and carrying capacity.

69 More recently, flatbed scanners have used to periodically image growing biofilms (Levin-Reisman et al.,  
70 2010). However, most flat- bed scanners have an optical resolution slightly greater than 5  $\mu\text{m}$  per pixel,  
71 which cannot reliably image individual cells. The lack of resolution limits the initial measurement to a  
72 relatively late stage in population development, when colonies/biofilms can be clearly resolved.  
73 Consequently, lag time is not directly observed and edge effects and other local competition artifacts  
74 are present. In the case of the widely used synthetic genetic array (SGA), epistatic miniarray profile (E-  
75 MAP) and SCANlag methods, effects of some confounding factors are corrected by the latest generation  
76 of analytical tools; however, given that multiple data sets involving many query strains are required to  
77 normalize for batch effects (Baryshnikova et al., 2010), sensitivity is proportional to the scale of the  
78 study using these methods, which limits their tactical utility.

79 In this work, we present a platform capable of high-density measurements of lag times prior to the  
80 attainment of doubling times during exponential growth, and carrying capacities at stationary phase  
81 through time course microscopy-based imaging of microcolonies growing on solid media. Because each  
82 microcolony is seeded from one to a few cells and hundreds of microcolonies can be analyzed for each  
83 strain, population heterogeneity of the three growth parameters can be assessed on a strain by strain  
84 basis. Through increased sensitivity and the potential for growth parameter profiling, the enhanced  
85 resolution afforded by this novel method of multiparameter fitness assessment can facilitate the  
86 generation and/or refinement of gene-gene and gene-environment interaction networks for yeast and  
87 other colony forming organisms.

## 88 MATERIALS AND METHODS

89 **Yeast strains and growth conditions:** Unless otherwise specified, all experiments were performed at  
90 30°C temperature using rich growth media, YEPD, [1 % w/v yeast extract (BD), 2 % w/v peptone (BD), 2  
91 % w/v dextrose (BD)]. Galactose growth media contained 2 % w/v galactose (Acros) in place of glucose  
92 and solid media contained 2 % w/v agar (BD) for cell spotting assays or 1.0 % w/v agarose (Invitrogen)  
93 for ODELAY analyses. *S. cerevisiae* strains used in this study are listed in Supplementary Table 1 online.  
94 All strains have been previously described<sup>9,20</sup>.

95 **ODELAY Culture Preparation:** Stringent culture conditions were required for reproducible growth  
96 phenotypes. 220 µL yeast cultures were inoculated in 96 well flat bottom plates (Corning Costar) and  
97 grown overnight. Cultures were then diluted 1:11 and optical densities read using a Synergy H4 plate  
98 reader. Individual wells were then diluted to a density of 0.09 OD and the culture grown for 6 hours to  
99 ensure all strains were in exponential phase. The cultures were again measured using the plate reader  
100 and then diluted to 0.01 OD. The 96 well plate containing the prepared cultures was then sonicated for  
101 30 second in an ice-cold water ultrasonic bath to dissociate cell clusters.

102 **ODELAY Slide preparation and yeast array setup:** Growth media was prepared as a 1:1:8 mixture of the  
103 following sterile stock solutions, respectively, 10X YEP (10 % w/v yeast extract and 20 % w/v peptone),  
104 20 % w/v carbon source (glucose or galactose) and 1.33 % w/v agarose in water. Typically, a 150 mL  
105 volume of 1.33 % agarose stock was prepared, divided into 15 mL aliquots in 50 mL conical bottom  
106 tubes and stored at 4 °C until use. Agarose aliquots with 2 mL 10X YEP and 2 mL 20% carbon source  
107 were placed in rapidly boiling water for 20 minutes to completely melt the agarose gel. Water lost to  
108 evaporation was replaced by weighing the conical tube before and after boiling, yielding a final growth  
109 substrate containing 1 % yeast extract, 2 % peptone, 2 % carbon source and 1 % agarose. The molten  
110 solution was poured into custom molds that formed 2 mm slabs of agar supported by 50 mm by 75 mm  
111 by 0.1-inch glass slides (Fisher Scientific). The apparatus was allowed to cool to room temperature and,

112 after careful separation of the glass slides, the agar plates were equilibrated overnight in a humidified  
113 chamber. Careful separation of the glass slides was critical as any mechanical deformation of the agar  
114 altered the lag time and doubling time of cultures in the regions deformed. The following day, yeast in  
115 exponential liquid culture, diluted to an  $OD_{600}$  of  $\sim 0.01$ , were spotted onto agarose slabs using a Matrix  
116 Hydra DT fluidics robot (ThermoScientific). Slides were air dried for  $\sim 3$ -5 minutes and then placed inside  
117 a microscope equipped with a humidified environmental chamber maintained at  $30^{\circ}\text{C}$ .

118 **ODELAY Image acquisition time course:** Bright field images were captured using a Leica DMI6000  
119 microscope (Leica) equipped with a 10X objective. Images were recorded by a Hammamasu ORCA Flash  
120 4.0. The microscope stage movements and camera were controlled by a custom MATLAB graphical user  
121 interface using the Micromanager Core API version 1.4(Edelstein et al., 2014). MATLAB scripts controlled  
122 the stage to predefined positions. A custom autofocus routine found focus at the center of each spot by  
123 maximizing the image's focus score using utilizing the Laplacian variance function(Pertuz et al., 2013).  
124 After focus was found a  $3 \times 3$  tiled image was recorded which covered a  $9 \text{ mm}^2$  area of the agar. These  
125 steps were repeated on each of the 96 spotted strains in either 30 minute or 1 hour increments for 48  
126 hours.

127 **Automated ODELAY image analysis:** Image acquisition and panorama stitching were performed using  
128 MATLAB scripts. Briefly images were stitched using a method based on FFT phases(Preibisch et al.,  
129 2009). A threshold of the stitched images was calculated by taking histograms of a subdivided image and  
130 finding the maximum intensities of 100 regions within the subdivided images. This threshold was used to  
131 binarize images and colony area was data quantified using MATLAB functions. The  $\log_2$  of colony area  
132 was plotted versus time and colony area fit to a parameterized version of the Gompertz function ( $f$   
133 )(Gompertz, 1825; Zwietering et al., 1990),

134 
$$f(t) = a_0 + be^{-e^{\left[\frac{e v_{max}}{b}(t_{lag}-t)+\log\left(\frac{3+\sqrt{5}}{2}\right)\right]}}$$
 (1)

135 Where  $a_0$  and  $b$  are parameters that represent the initial size and final saturation of the colonies;  $v_{max}$   
136 maximum growth velocity, and  $t_{lag}$  colony lag time. Growth parameters were solved for directly. The  
137 *gompertzFit* routine calculates an initial estimate of the Gompertz function (1) using a coarse grid  
138 optimization and then attempts to find a constrained minimum of the function (1) at this initial estimate  
139 using the *fmincon* MATLAB function. In order to proceed to curve fitting, colonies must be matched at 5  
140 or more time points through the monitored time course. In addition, colonies that do not exhibit at least  
141 a doubling in area are eliminated from curve fitting. This is achieved by only fitting data for which the  
142 maximum observed cross-sectional area of each tracked object is at least two-fold greater than the  
143 object's measured cross-sectional area at the first time-point. Doubling time ( $t_d$ ) is calculated as  
144 follows:

145 
$$t_d = \frac{\ln 2}{v_{max}},$$
 (2)

146 where  $v_{max}$  is the point at which the growth rate,  $f'(t)$ , reaches maximum (achieved at  $f''(t) = 0$ ). Lag  
147 time ( $t_{lag}$ ) is defined as the time to reach maximum growth acceleration,  $a_{max}$ , where  $f''(t)$  is greatest  
148 (achieved at the lower value of the two solutions to  $f'''(t) = 0$ ). The carrying capacity ( $K$ ), in pixel area,  
149 represents the cross-sectional area of the base of the modeled microcolony projected to stationary  
150 phase ( $f(t)$  as  $t \rightarrow \infty$ ) and is calculated as follows:

151 
$$K = a + b.$$
 (3)

152 **BioScreen doubling time determination:** Automated optical density measurements of yeast cultures  
153 were obtained using a BioScreen C (Growth Curves USA) using manufacturer's suggested protocols with

154 the exception that culture volume was reduced to 200  $\mu$ L to prevent artifacts arising from liquid  
155 splashing onto the plate lid during maximal agitation. A starting OD<sub>600</sub> of 0.05 was utilized in order to  
156 ensure that cultures were in exponential phase once they entered the empirically determined linear  
157 range of the instrument. Growth curves were fit using the *gompertzFitBioScreen* function with is  
158 identical to the *gompertzFit* function except optimized for the range of OD<sub>600</sub> values obtained from the  
159 Bioscreen C instead of observed area.

## 160 RESULTS AND DISCUSSION

161 **Development of an automated scalable solid-phase doubling time estimation platform:** An ideal solid-  
162 phase, time-resolved, growth analysis platform would allow for high sample density and be amenable to  
163 automated data acquisition and processing. The optimized method, which we have termed ODELAY for  
164 One-cell Doubling Evaluation by Living Arrays of Yeast, is depicted schematically (Fig. 1) and consists of  
165 four stages: spotting of ordered arrays of live yeast onto thin beds of growth substrate on a glass slide  
166 support (Fig. 1A); periodic bright field image acquisition over a user-specified time course (Fig 1B);  
167 processing of raw bright field data to extract microcolony cross-sectional area data (Fig. 1C) and post-  
168 processing calculation of growth parameters for each individual microcolony within each spot (Fig. 1D).  
169 ODELAY is applicable to a wide range of growth substrates and incubation temperatures and is highly  
170 scalable, as it can analyze 10<sup>5</sup> to 10<sup>6</sup> individual microcolonies per experiment.

171 ODELAY consists of an automated pipeline that encompasses acquisition and processing of images,  
172 identification and measurement of microcolonies at each time point, matching of microcolonies through  
173 time and extrapolation of growth parameters from growth curves. This current platform employs  
174 theoretical approximation of ODELAY growth curves using the Gompertz function as an unsupervised  
175 method to extract growth parameters(Gompertz, 1825; Preibisch et al., 2009). All files required for



176 execution of automated ODELAY analysis, as well as a demonstrative data set, are available as  
177 Supplementary Files online.

178 **Determination of growth parameters by ODELAY:** First, data are acquired, and then growth parameters  
179 of doubling time, lag time and carrying capacity are determined by directly fitting a parameterized  
180 version of the Gompertz function (Eq. 1). For data acquisition, the first time point would ideally be  
181 acquired immediately after spotting onto agar at the desired growth temperature, but for practical  
182 purposes, the starting time is when the cells are spotted at room temperature on the solid substrate.  
183 The plate is then transferred to an environmentally controlled chamber and growing colonies are  
184 tracked until they merge with their neighbors. The time required for colonies to merge is therefore  
185 related to the initial cell density and the ultimate carrying capacity of adjacent colonies. While many  
186 colonies merge before carrying capacities are observed, ODELAY will still estimate carrying capacity as  
187 long as a sufficient number of data points are collected after maximum growth velocity is achieved. This  
188 is a feature of the Gompertz function's symmetry about maximum growth velocity, which permits fair  
189 estimation of carrying capacity even when it is not directly measured. Note that caution should be  
190 exercised when examining phenotypes associated with increased carrying capacity because the  
191 Gompertz function may not accurately estimate all possible outcomes.

192 **Comparison of ODELAY to established methods:** We directly compared doubling times and lag times  
193 calculated by multiple ODELAY population measurements to liquid culture  $OD_{600}$  measurements made  
194 using the BioScreen C instrument for both fast and slow growing strains taken from the MAT $\alpha$  yeast  
195 deletion library (Winzeler et al., 1999) (Fig. 2A). Population doubling times and precision of this  
196 measurement across replicates were roughly comparable between the two platforms (Fig. 2A).  
197 Measured doubling times for 140 yeast strains correlated well between the two platforms with a  
198 Pearson coefficient of 0.76 and Spearman coefficient of 0.70 (Fig. 2B). Lag times showed less agreement,

199 likely due to the liquid versus solid culture medium, and the lack of sensitivity of optical density  
200 measurements at low cell concentrations. In addition, unlike BioScreen, ODELAY identified slow growing  
201 outliers because microcolony growth curves are derived from single cells. In contrast, liquid culture  
202 OD<sub>600</sub> curves measure an aggregate of all cells in a population, and therefore are not sensitive to the  
203 contribution of individual cell's.

204 Microcolony convergence is the limiting factor of ODELAY's dynamic range, which can be controlled by  
205 altering the initial cell density obtained when spotting yeast cultures. In contrast, the dynamic range of  
206 liquid culture measurements is limited by either the nutrient capacity of the media or the linear range of  
207 the density sensor. Due to differences in strain doubling times, the dynamic range is best defined by the  
208 total number of doublings required to reach the upper limit starting from a single cell. At optimal seed  
209 density (~25 - 50 cells/mm<sup>2</sup>), the dynamic range of ODELAY is 8 - 12 doublings – from a single cell up to  
210 250 or as many as 4000 cells, which compares favorably to a dynamic range of 3 - 5 doublings attainable  
211 by most currently available technologies.

212 In traditional biofilm assays, the size of a colony is dependent on the number of viable individuals  
213 contributing to the colony population, the number of doublings these cells have undergone, the amount  
214 of nutrients present, and the ability of the colony to transport nutrients to its reproducing members.  
215 The contribution of individuals to the overall colony size is not distinguished by traditional methods such  
216 as liquid based assays or spot based assays. In contrast, ODELAY tracks individual cells forming into  
217 colonies and can quantify population heterogeneity that other methods cannot resolve.

#### 218 **Example applications of ODELAY:**

219 **Identification of doubling time phenotypes:** To illustrate the ability of ODELAY to compare population  
220 heterogeneity of growth phenotypes between strains such that features of the population distributions  
221 may be evaluated we focused on members of the SWR1 complex of chromatin modifiers (Fig. 2C).

222 Chromatin modification is one way for the emergence of epigenetic differences that can manifest as  
223 heterogeneity within isogenic populations. We observed population heterogeneity in two strains *swc3Δ*  
224 and *ARP6-GFP* (Fig. 2C) but not in their respective GFP tagged or deletion mutant. Population  
225 heterogeneity has been observed before in *SWR1* deletion strains when measuring *POT1-GFP*  
226 expression during a carbon source switch from glucose to oleic acid (Knijnenburg et al., 2011). In that  
227 instance, deletion of other members of the *SWR1* complex induced bimodal expression of *POT1-GFP*.  
228 Here, the bimodality of growth phenotypes emerged from cells grown strictly on glucose media and  
229 without any stimulation from a change in carbon source. This observation demonstrates that ODELAY  
230 readily detects subpopulations of cells present in standard culture of deletion and GFP fusion strains.

231 **Identification of lag time phenotype:** Through ODELAY analysis, outliers with highly variable, expanded  
232 or contracted lag periods can be identified by assessing the distribution of lag times for microcolonies of  
233 a given strain (lag time variability) as well as relative lag between tested strains. To demonstrate the  
234 quantification of lag time by ODELAY, we exploited the well-studied and highly regulated response of  
235 yeast to a carbon source shift from its preferred source, glucose, to an alternative source,  
236 galactose (Ideker, 2004; Sellick et al., 2008). This shift is characterized by a lag phase, during which, the  
237 normally repressed galactose utilization machinery, including the galactose transporter, is induced.  
238 Exponentially growing yeast preconditioned in either glucose or galactose liquid medium were spotted  
239 onto solid media containing galactose and analyzed by ODELAY (Fig. 4A). Cells preconditioned in  
240 galactose media exhibited a highly synchronized response characterized by short lag times. In contrast,  
241 more pronounced and variable lag times were observed for cells that were not primed for growth in  
242 galactose. Once glucose grown cells acclimated to the shift to galactose and entered exponential phase,  
243 they doubled at rates similar to those observed for galactose preconditioned cells.

244 As with heterogeneity of doubling times, ODELAY enables the detection of heterogeneity in lag times.  
245 To demonstrate the utility of ODELAY in assessing population heterogeneity of lag times, we compared  
246 growth parameters of a wild-type yeast strain (BY4742) in galactose-containing medium after pre-  
247 growth in glucose media for differing amounts of time (Fig. 3A). We staggered seeding of cultures such  
248 that cells were pre-grown in glucose media for 3, 6, 24 and 48 hours (Fig. 3B). The resulting cultures  
249 were then spotted on galactose media and their growth phenotypes observed (Fig. 3C). Not only did lag  
250 time correlate with the length of time that yeast was cultured in glucose but also colony-to-colony  
251 variation in lag times increased for the longer incubation times. This example demonstrates ODELAY's  
252 ability to capture the effects of environmental perturbations on population heterogeneity, a feature  
253 which is difficult to distinguish using other solid-media growth assays.

254 **Large-scale multiparameter analyses with ODELAY:** A strength of the ODELAY platform is to extract  
255 doubling times and lag times for populations of cells growing on solid media in a high-throughput  
256 manner. To demonstrate multiparameter growth rate analysis by ODELAY, we assayed a collection of  
257 140 strains that contained gene deletions of transcription factors, transcriptional regulators, and nuclear  
258 transport factors including nucleoporins and karyopherins. The genes selected were previously  
259 associated with regulating the response to a carbon source shift (Winzeler et al., 1999; Knijnenburg et al.,  
260 2011; Van de Vosse et al., 2011; Aitchison and Rout, 2000).

261 For the deletion strains, we quantified colony doubling times, lag times and estimated carrying  
262 capacities during a carbon source switch from glucose to galactose, using galactose to galactose  
263 transition as a control. This rich multivariate dataset underscores how ODELAY can reveal complex and  
264 heterogeneous growth phenotypes of populations of individual cells growing into colonies (Fig. 4).  
265 Strains with noticeably strong increases in doubling time include *dot1Δ*, *htl1Δ*, *eaf5Δ*, *eaf7Δ*, and

266 *spt20Δ*. Of these five examples, only *spt20Δ* had been reported to have reduced growth rate on  
267 galactose media (Roberts and Winston, 1996).

268 In general, reporting absolute values of growth parameters is rare in the literature. Here we present a  
269 second large-scale application of ODELAY -- to compare doubling times of yeast mutants to the parent  
270 strain. A commonly overlooked class of mutant includes the C-terminal tagging with GFP, which is often  
271 assumed to have negligible effects on growth when compared with the more dramatic growth defects  
272 observed in deletion strains. We tested this assumption by comparing the doubling time of the  
273 previously mentioned deletion strains and the corresponding GFP fusion strains against their parent  
274 strain, BY4742 (Tables 1 and 2 and supplementary data). All measurements were repeated in triplicate  
275 on rich glucose media with the most frequently observed doubling time, the population mode, of each  
276 replicate was compared to the parent strain using the Students T-test. ODELAY was able to resolve 12  
277 GFP fusions with doubling times significantly decreased compared to BY4742 and 71 strains that have  
278 significantly increased doubling times (Table 1). The deletion strains had 11 strains with significantly  
279 decreased doubling times while 72 had significantly increased doubling times (Table 2). While the  
280 majority of the doubling time differences for the GFP strains were less than 5 minutes, the presence of  
281 the GFP tag does appear to have a wide-spread and significant impact on growth rates on rich media.

282 ODELAY is a quantitative tool capable of multiparameter growth analysis based on time resolved  
283 microcolony expansion on solid media. The unique features of ODELAY include its relatively large  
284 dynamic range, when compared to other available methods, which enables quantitative measurement  
285 of doubling time, lag time and carrying capacity in a single experiment. Additionally, ODELAY has the  
286 ability to assess population heterogeneity, including viability, through the analysis of single  
287 microcolonies. These features of ODELAY open unexplored avenues for characterizing cellular fitness for  
288 even well studied organisms such as baker's yeast. Although all initial experiments have utilized haploid

289 baker's yeast, this methodology can be applied in other colony-forming organisms including medically  
290 relevant bacteria such as *Mycobacterium tuberculosis*, *Pseudomonas aeruginosa*, *Staphylococcus aureus*  
291 and others.

292 In this report, we have validated ODELAY by comparison to the well-established OD<sub>600</sub> liquid culture.  
293 These experiments revealed that while both liquid culture OD<sub>600</sub> assays and ODELAY yield doubling times  
294 of similar precision and accuracy, ODELAY has the capability to quantitatively resolve heterogeneity  
295 from mixed populations of cells into distinct sub-populations. The examples we depict are mutant  
296 members of the SWR1 complex as these genes are involved in chromatin remodeling (Krogan et al.,  
297 2003). Heterogeneity in this case is likely indicative of cell dysregulation and therefore expected in the  
298 SWR1 complex deletion mutants. However, C-terminal tagging with GFP is often assumed not to induce  
299 a growth phenotype yet we clearly observe bimodal growth phenotypes in *ARP6-GFP*. These findings  
300 reaffirm that tagging a protein with GFP can influence its function and have consequences that manifest  
301 in altered cell regulation and ultimately cell growth. In general, we observe slight but significant  
302 reductions in growth rate for many GFP-tagged mutants when grown in rich media and without  
303 environmental perturbations. These growth phenotypes may appear with greater magnitude in defined  
304 or minimal media. These stratifications of yeast fitness phenotypes promise to add new dimensions for  
305 understanding the genetic landscape of the cell. Since small perturbations to genes (such as GFP  
306 fusions) are readily observed with ODELAY, the effects of multiple gene perturbations can be statistically  
307 quantified and used to investigate genetic regulatory networks unobservable by existing SGA and E-MAP  
308 methods.

309 As with other growth assays, there are caveats associated with ODELAY. Extraction of cell doubling time  
310 by ODELAY relies on the assumption that microcolony cross-sectional area is directly proportional to the  
311 volume of cells in a given colony and that this relationship between volume and area are unaffected by

312 changes in growth condition and/or genetic background. There will certainly be exceptions to this  
313 assumption in yeast, and other colony forming microorganisms; however, similar to the limitations in  
314 liquid culture OD<sub>600</sub> analysis when applied to flocculent mutant strains, such exceptions may yield  
315 informative phenotypic information. Furthermore, ODELAY could be adapted to analyze 3D volume of  
316 the growing micro-colonies; however, this would trade off time for collecting images or limit the total  
317 area interrogated. Lag time measurements were also observed to have local variations, which are also  
318 commonly observed in other solid phase growth assays(Baryshnikova et al., 2010; Levin-Reisman et al.,  
319 2010). There are several other practical benefits of ODELAY's high-throughput growth rate analysis on  
320 solid media over liquid media assays, including increased sample density and reduced handling and  
321 materials. The major benefit of ODELAY is the ease with which to quantitatively monitor, for up to  
322 hundreds of thousands of individual microcolonies, growth parameters that together define colony  
323 expansion from single seeded cells. ODELAY provides a resolution beyond that permitted by non-  
324 dynamical metrics of fitness.

## 325 **ACKNOWLEDGEMENTS**

326 The authors acknowledge support for this work by grants U54 RR022220 and P50 GM076547 to J.D.A  
327 from the U.S. National Institutes of Health. We also thank the Luxembourg Centre for Systems  
328 Biomedicine and the University of Luxembourg for support.

## 329 **Author Contributions**

330 D.J.D. conceived the ODELAY method. ODELAY was developed by T.E.H., A.V.R., and D.J.D., with  
331 intellectual support from S.L., J.J.S. and J.D.A. T.E.H. and S.L. performed all experiments. T.E.H. and D.J.D.  
332 wrote the manuscript with contributions from A.V.R., F.D.M., J.J.S. and J.D.A.

### 333 **Supplementary Files**

334 All files are available for download at: <http://aitchisonlab.com/ODELAY>

- 335 **1. ODELAY\_README.txt**
- 336 **2. ODELAY Strain List.docx** The complete list of strains measured in this experiment
- 337 **3. ODELAY MicroscopeControl.zip** Files that control Leica DMI6000 microscope with a 10X  
338 **objective**
- 339 **4. ODELAY Image Processing Tool.zip** Files that contain a data viewer and data analysis packages
- 340 **5. ODELAY Hardware Design.zip** AUTOCAD files and word files that demonstrate how to mold  
341 **agar media for ODELAY experiments**
- 342 **6. ODELAY Stage Mount.zip** AUTOCAD files and PDFs that depict the stage assembly utilized to  
343 **collect ODELAY time course experiments**
- 344 **7. ODELAY Sample Data.zip** Example data sets for demonstrating ODELAY software functionality.

### 345 **References**

346

- 347 Aitchison, J.D., and Rout, M.P. (2000). The road to ribosomes. Filling potholes in the export pathway. *J.*  
348 *Cell Biol.* *151*, F23–F26.
- 349 Baryshnikova, A., Costanzo, M., Kim, Y., Ding, H., Koh, J., Toufighi, K., Youn, J.-Y., Ou, J., San Luis, B.-J.,  
350 Bandyopadhyay, S., et al. (2010). Quantitative analysis of fitness and genetic interactions in yeast on a  
351 genome scale. *Nat. Methods* *7*, 1017–1024.
- 352 Breslow, D.K., Cameron, D.M., Collins, S.R., Schuldiner, M., Stewart-Ornstein, J., Newman, H.W., Braun,  
353 S., Madhani, H.D., Krogan, N.J., and Weissman, J.S. (2008). A comprehensive strategy enabling high-  
354 resolution functional analysis of the yeast genome. *Nat. Methods* *5*, 711–718.
- 355 Bryan, A.K., Goranov, A., Amon, A., and Manalis, S.R. (2010). Measurement of mass, density, and volume  
356 during the cell cycle of yeast. *Proc. Natl. Acad. Sci. U. S. A.* *107*, 999–1004.
- 357 Collins, S.R., Schuldiner, M., Krogan, N.J., and Weissman, J.S. (2006). A strategy for extracting and  
358 analyzing large-scale quantitative epistatic interaction data. *Genome Biol.* *7*, R63.



- 359 Costanzo, M., Baryshnikova, A., Bellay, J., Kim, Y., Spear, E.D., Sevier, C.S., Ding, H., Koh, J.L.Y., Toufighi,  
360 K., Mostafavi, S., et al. (2010). The genetic landscape of a cell. *Science* 327, 425–431.
- 361 Edelstein, A.D., Tsuchida, M.A., Amodaj, N., Pinkard, H., Vale, R.D., and Stuurman, N. (2014). Advanced  
362 methods of microscope control using  $\mu$ Manager software. *J. Biol. Methods* 1, 10.
- 363 Godin, M., Delgado, F.F., Son, S., Grover, W.H., Bryan, A.K., Tzur, A., Jorgensen, P., Payer, K., Grossman,  
364 A.D., Kirschner, M.W., et al. (2010). Using buoyant mass to measure the growth of single cells. *Nat.*  
365 *Methods* 7, 387–390.
- 366 Gompertz, B. (1825). On the Nature of the Function Expressive of the Law of Human Mortality, and on a  
367 New Mode of Determining the Value of Life Contingencies. *Philos. Trans. R. Soc. Lond.* 115, 513–583.
- 368 Ideker, T. (2004). A systems approach to discovering signaling and regulatory pathways--or, how to  
369 digest large interaction networks into relevant pieces. *Adv. Exp. Med. Biol.* 547, 21–30.
- 370 Knijnenburg, T.A., Roda, O., Wan, Y., Nolan, G.P., Aitchison, J.D., and Shmulevich, I. (2011). A regression  
371 model approach to enable cell morphology correction in high-throughput flow cytometry. *Mol. Syst.*  
372 *Biol.* 7, 531.
- 373 Kortmann, H., Blank, L.M., and Schmid, A. (2009). Single cell analysis reveals unexpected growth  
374 phenotype of *S. cerevisiae*. *Cytom. Part J. Int. Soc. Anal. Cytol.* 75, 130–139.
- 375 Krogan, N.J., Keogh, M.-C., Datta, N., Sawa, C., Ryan, O.W., Ding, H., Haw, R.A., Pootoolal, J., Tong, A.,  
376 Canadien, V., et al. (2003). A Snf2 family ATPase complex required for recruitment of the histone H2A  
377 variant Htz1. *Mol. Cell* 12, 1565–1576.
- 378 Lawless, C., Wilkinson, D.J., Young, A., Addinall, S.G., and Lydall, D.A. (2010). Colonyzer: automated  
379 quantification of micro-organism growth characteristics on solid agar. *BMC Bioinformatics* 11, 287.
- 380 Levin-Reisman, I., Gefen, O., Fridman, O., Ronin, I., Shwa, D., Sheftel, H., and Balaban, N.Q. (2010).  
381 Automated imaging with ScanLag reveals previously undetectable bacterial growth phenotypes. *Nat.*  
382 *Methods* 7, 737–739.
- 383 Memarian, N., Jessulat, M., Alirezaie, J., Mir-Rashed, N., Xu, J., Zareie, M., Smith, M., and Golshani, A.  
384 (2007). Colony size measurement of the yeast gene deletion strains for functional genomics. *BMC*  
385 *Bioinformatics* 8, 117.
- 386 Monod, J. (1949). The Growth of Bacterial Cultures. *Annu. Rev. Microbiol.* 3, 371–394.
- 387 Murakami, C., and Kaeberlein, M. (2009). Quantifying yeast chronological life span by outgrowth of aged  
388 cells. *J. Vis. Exp. JoVE*.
- 389 Pertuz, S., Puig, D., and Garcia, M.A. (2013). Analysis of focus measure operators for shape-from-focus.  
390 *Pattern Recognit.* 46, 1415–1432.
- 391 Preibisch, S., Saalfeld, S., and Tomancak, P. (2009). Globally optimal stitching of tiled 3D microscopic  
392 image acquisitions. *Bioinforma. Oxf. Engl.* 25, 1463–1465.

- 393 Roberts, S.M., and Winston, F. (1996). SPT20/ADA5 encodes a novel protein functionally related to the  
394 TATA-binding protein and important for transcription in *Saccharomyces cerevisiae*. *Mol. Cell. Biol.* *16*,  
395 3206–3213.
- 396 Sellick, C.A., Campbell, R.N., and Reece, R.J. (2008). Galactose metabolism in yeast-structure and  
397 regulation of the leloir pathway enzymes and the genes encoding them. *Int. Rev. Cell Mol. Biol.* *269*,  
398 111–150.
- 399 Shah, N.A., Laws, R.J., Wardman, B., Zhao, L.P., and Hartman, J.L. (2007). Accurate, precise modeling of  
400 cell proliferation kinetics from time-lapse imaging and automated image analysis of agar yeast culture  
401 arrays. *BMC Syst. Biol.* *1*, 3.
- 402 Sun, J., Stowers, C.C., Boczko, E.M., and Li, D. (2010). Measurement of the volume growth rate of single  
403 budding yeast with the MOSFET-based microfluidic Coulter counter. *Lab. Chip* *10*, 2986–2993.
- 404 Tucker, C.L., and Fields, S. (2004). Quantitative genome-wide analysis of yeast deletion strain  
405 sensitivities to oxidative and chemical stress. *Comp. Funct. Genomics* *5*, 216–224.
- 406 Van de Vosse, D.W., Wan, Y., Wozniak, R.W., and Aitchison, J.D. (2011). Role of the nuclear envelope in  
407 genome organization and gene expression. *Wiley Interdiscip. Rev. Syst. Biol. Med.* *3*, 147–166.
- 408 Winzeler, E.A., Shoemaker, D.D., Astromoff, A., Liang, H., Anderson, K., Andre, B., Bangham, R., Benito,  
409 R., Boeke, J.D., Bussey, H., et al. (1999). Functional characterization of the *S. cerevisiae* genome by gene  
410 deletion and parallel analysis. *Science* *285*, 901–906.
- 411 Zwietering, M.H., Jongenburger, I., Rombouts, F.M., and van 't Riet, K. (1990). Modeling of the bacterial  
412 growth curve. *Appl. Environ. Microbiol.* *56*, 1875–1881.
- 413
- 414

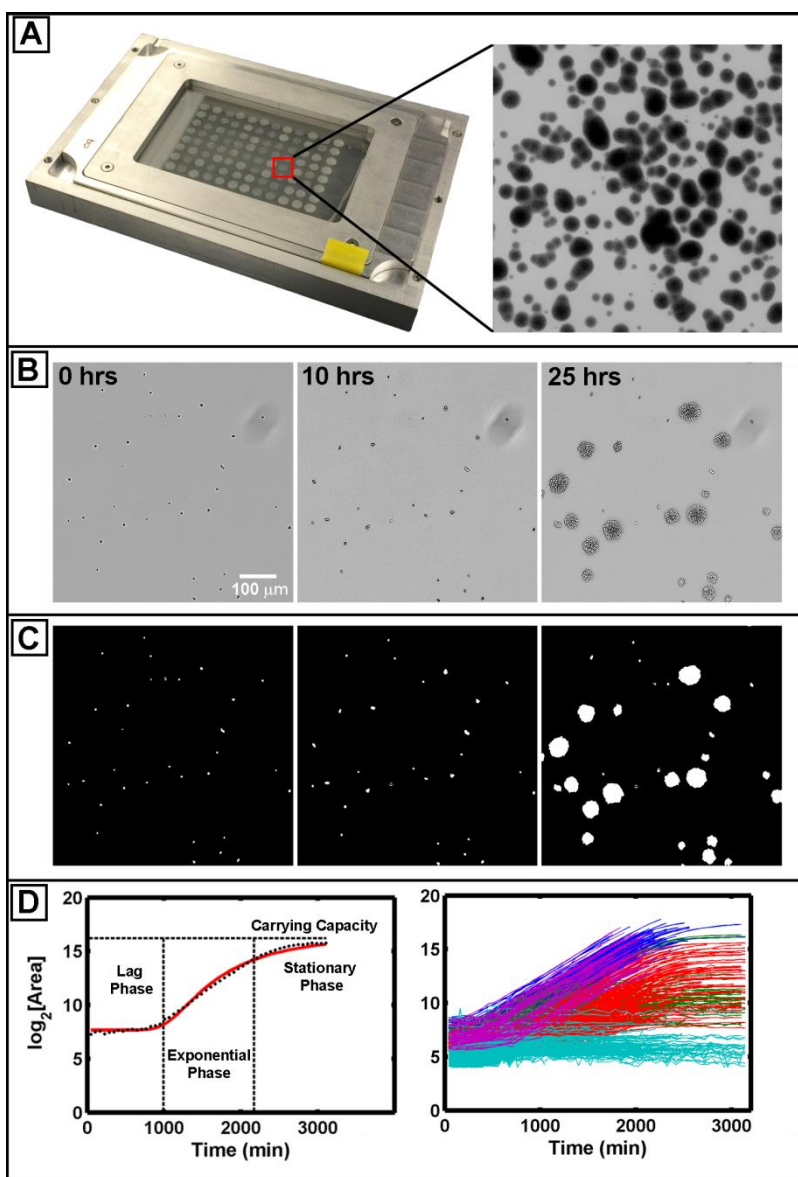

415

416 **Figure 1. One-cell Doubling Evaluation by Living Arrays of Yeast (ODELAY).** Solid-phase growth  
417 parameters are extracted by collecting time course image of growing colonies (1A and 1B). Colony areas  
418 are measured from thresholded and binarized images from the time course image series (1C). Colonies  
419 seeded from single yeast cells are tracked over time and the  $\log_2(\text{Area})$  is used to fit a parameterized  
420 version of the Gompertz function (1D left). A wild-type yeast strain (BY4741) was pre-grown to  
421 saturation with glucose as a carbon source and then assayed on galactose-containing agar. The resulting

422 heterogeneous colonies were clustered based on growth curve characteristics and graphed using colors  
423 to represent each cluster (1D right).

424

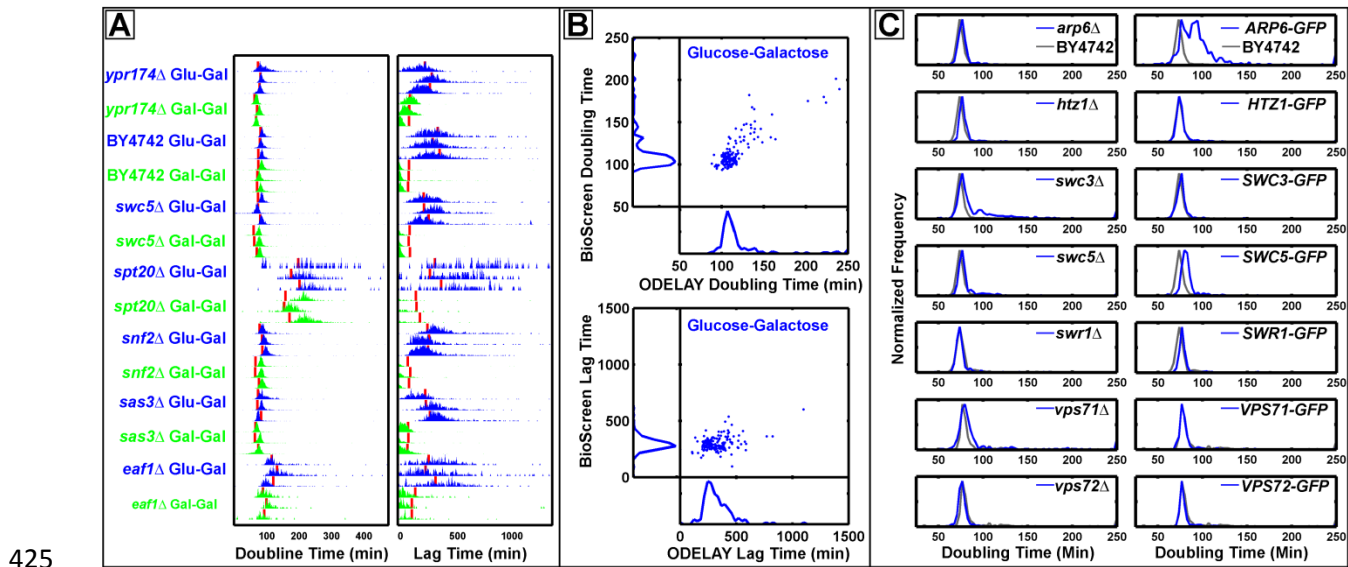

425

426 **Figure 2. Complex phenotypes observed by ODELAY.** Comparisons of doubling times and lag times for

427 repeated measurements (2A). Red lines indicate Bioscreen C results. Median ODELAY measurements

428 show good agreement with BioScreen C measurements in doubling time but less so in lag time (2B)

429 Population histograms of doubling time from SWR1 complex deletion and GFP-tagged strains (blue) with

430 comparison to the parent strain BY4742 (grey) (2C). Heterogeneity in doubling times is observed in

431 strains *swc3Δ* and ARP6-GFP while *arp6Δ* and SWC3-GFP appear similar to the parent strain BY4742.

432

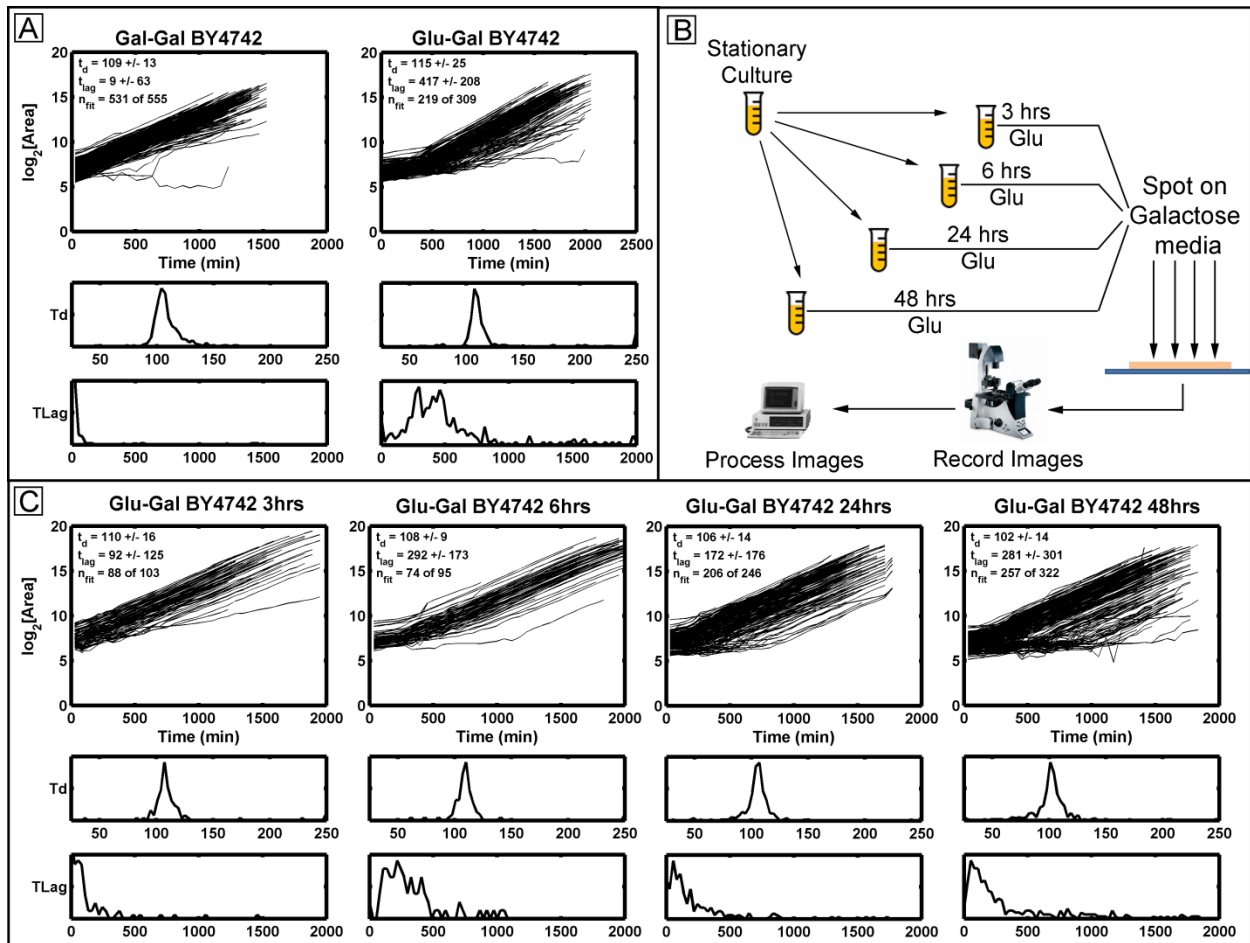

433

434 **Figure 3 Observing lag time after a carbon source switch:** Growth curves and histograms depicting lag  
 435 time (TLag) and doubling time (Td) for wild type yeast (BY4742) pre-grown in galactose (left) or glucose  
 436 (right) and then spotted on galactose media (A). Differing growth phenotypes are observed from  
 437 samples of a wild type yeast strain taken from the same culture at multiple times after seeding a source  
 438 culture (B and C). Histograms of the doubling time (Td) and lag time (TLag) are depicted below each set  
 439 of growth curves. Note the changes in the lag time distributions as the source culture is aged. This  
 440 demonstrates ODELAY's utility and sensitivity to culture conditions of yeast.

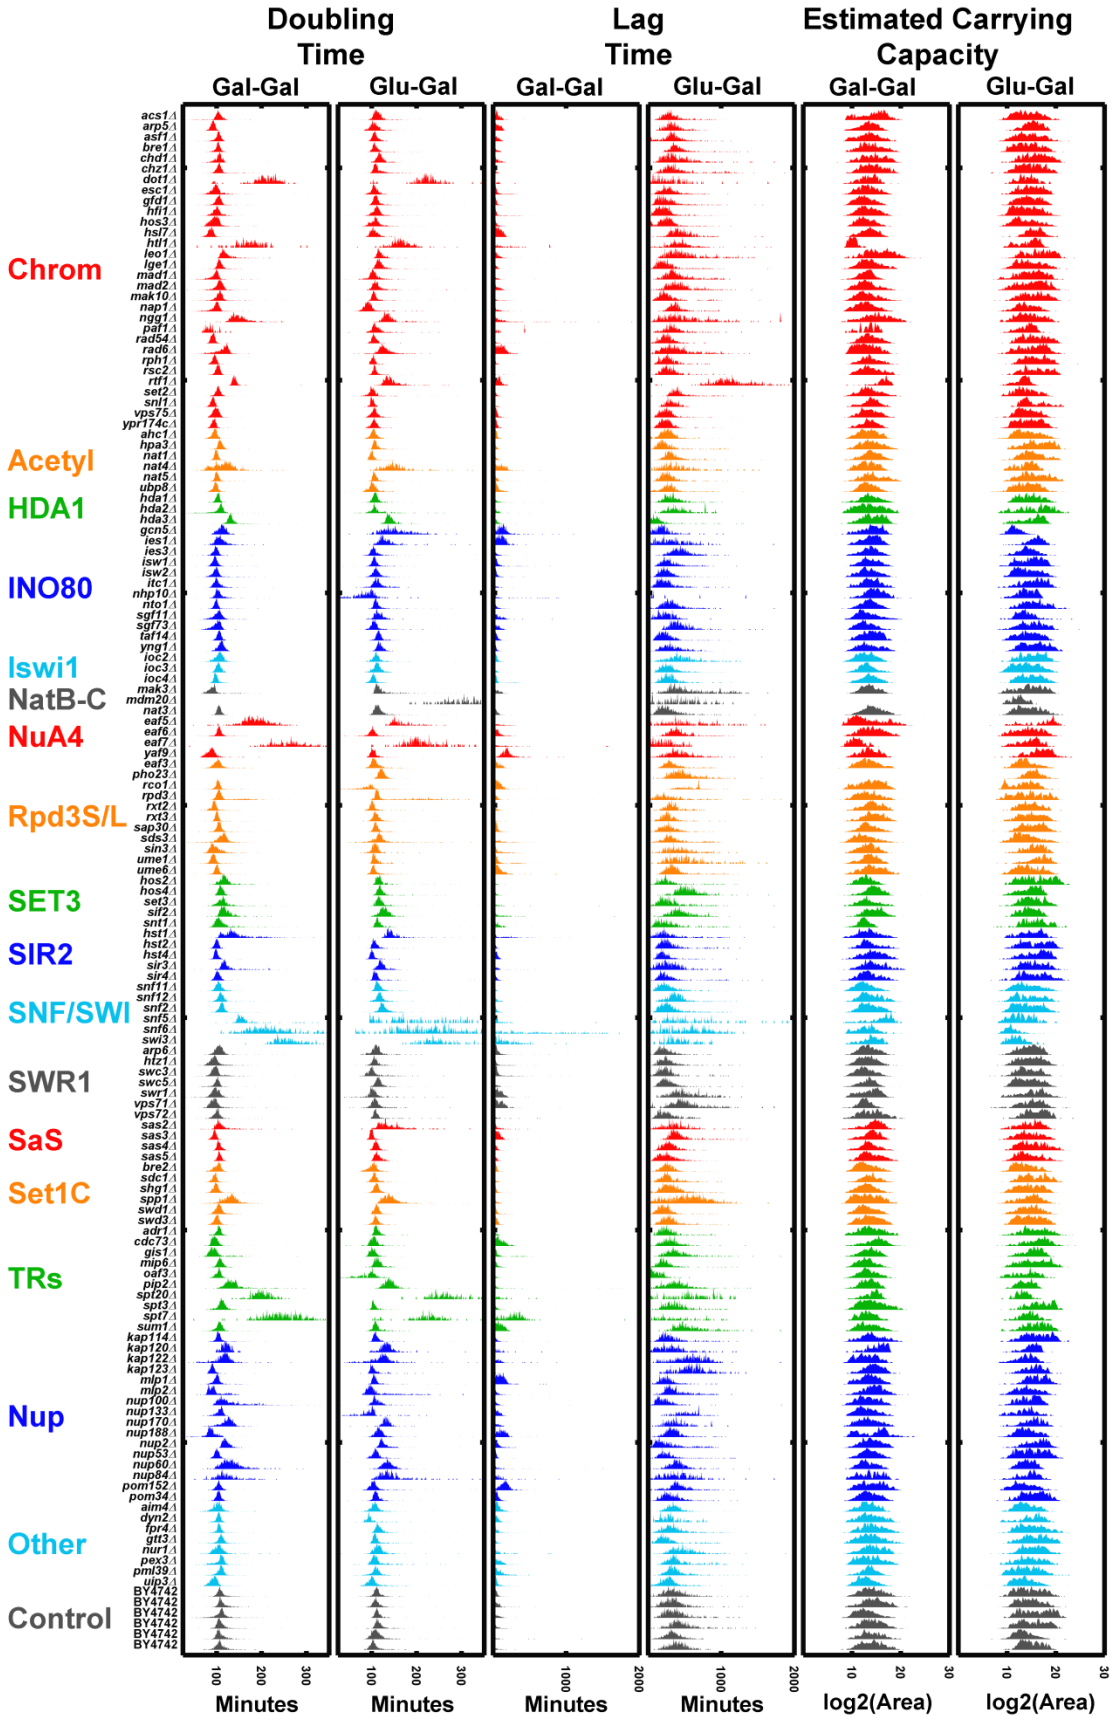

442 **Figure 4 Comparison of 140 Deletion Strains:** Doubling times, lag times and estimated carrying  
443 capacities of 140 deletion strains that underwent a glucose to galactose switch versus those that were  
444 maintained on galactose as a carbon source. Strains are grouped into categories according to annotated  
445 gene function (yeastgenome.org) including chromatin modifiers (Chrom), acetyltransferase enzymes  
446 (Acetyl), protein complexes (HDA1, INO80, NatB/C, NuA4, Rpd3S/L, Set3, SIR2, SNF/SWI, SWR1, SaS,  
447 SetC), transcriptional regulators (TRs), nucleoporins (Nup), and other genes associated with carbon  
448 source switching (other).

449



**Table 1: GFP-tagged library mutants with significant growth difference over wild type.**

| Strain             |                | Mean<br>Doubling<br>Time<br>Increase | Doubling<br>Time<br>SDEV | P-Val   | Strain           |                | Mean<br>Doubling<br>Time<br>Increase | Doubling<br>Time<br>SDEV | P-Val   |
|--------------------|----------------|--------------------------------------|--------------------------|---------|------------------|----------------|--------------------------------------|--------------------------|---------|
| <i>LGE1-GFP</i>    | <i>YPL055C</i> | -2.394                               | 1.322                    | 2.2E-07 | <i>SUM1-GFP</i>  | <i>YDR310C</i> | 0.725                                | 0.267                    | 1.0E-02 |
| <i>KAP122-GFP</i>  | <i>YGL016W</i> | -1.158                               | 2.177                    | 8.3E-45 | <i>ITC1-GFP</i>  | <i>YGL133W</i> | 0.764                                | 0.945                    | 4.0E-10 |
| <i>GCN5-GFP</i>    | <i>YGR252W</i> | -0.922                               | 0.660                    | 5.9E-18 | <i>NHP10-GFP</i> | <i>YDL002C</i> | 0.806                                | 1.058                    | 4.6E-02 |
| <i>EAF7-GFP</i>    | <i>YNL136W</i> | -0.829                               | 2.023                    | 1.4E-50 | <i>SNL1-GFP</i>  | <i>YIL016W</i> | 0.942                                | 1.119                    | 8.5E-17 |
| <i>HDA2-GFP</i>    | <i>YDR295C</i> | -0.724                               | 1.110                    | 3.1E-24 | <i>SPP1-GFP</i>  | <i>YPL138C</i> | 0.949                                | 1.110                    | 2.4E-16 |
| <i>KAP123-GFP</i>  | <i>YER110C</i> | -0.666                               | 0.633                    | 3.1E-02 | <i>NUP60-GFP</i> | <i>YAR002W</i> | 0.961                                | 1.293                    | 9.7E-08 |
| <i>ACS1-GFP</i>    | <i>YAL054C</i> | -0.393                               | 0.952                    | 1.3E-02 | <i>SWR1-GFP</i>  | <i>YDR334W</i> | 0.972                                | 1.490                    | 1.1E-03 |
| <i>RAD54-GFP</i>   | <i>YGL163C</i> | -0.334                               | 0.576                    | 1.1E-03 | <i>SIR3-GFP</i>  | <i>YLR442C</i> | 1.004                                | 1.528                    | 2.3E-22 |
| <i>NGG1-GFP</i>    | <i>YDR176W</i> | -0.298                               | 1.134                    | 1.5E-45 | <i>HOS3-GFP</i>  | <i>YPL116W</i> | 1.039                                | 0.958                    | 1.1E-03 |
| <i>YPR174c-GFP</i> | <i>Ypr174c</i> | -0.231                               | 1.496                    | 3.1E-02 | <i>NAT5-GFP</i>  | <i>YOR253W</i> | 1.094                                | 1.526                    | 1.4E-04 |
| <i>DYN2-GFP</i>    | <i>YDR424C</i> | -0.175                               | 0.307                    | 1.1E-02 | <i>GFD1-GFP</i>  | <i>YMR255W</i> | 1.200                                | 0.646                    | 2.1E-03 |
| <i>HOS2-GFP</i>    | <i>YGL194C</i> | -0.060                               | 0.848                    | 2.2E-02 | <i>SGF73-GFP</i> | <i>YGL066W</i> | 1.268                                | 1.078                    | 7.6E-03 |
| <i>LEO1-GFP</i>    | <i>YOR123C</i> | 0.010                                | 0.323                    | 3.7E-18 | <i>HOS4-GFP</i>  | <i>YIL112W</i> | 1.271                                | 0.860                    | 1.2E-05 |
| <i>ASF1-GFP</i>    | <i>YJL115W</i> | 0.099                                | 0.362                    | 7.5E-05 | <i>DOT1-GFP</i>  | <i>YDR440W</i> | 1.276                                | 1.004                    | 5.5E-69 |
| <i>RXT3-GFP</i>    | <i>YDL076C</i> | 0.160                                | 1.441                    | 2.3E-03 | <i>SWC3-GFP</i>  | <i>YAL011W</i> | 1.303                                | 0.889                    | 1.5E-15 |
| <i>NUP84-GFP</i>   | <i>YDL116W</i> | 0.246                                | 0.427                    | 1.9E-52 | <i>UME1-GFP</i>  | <i>YPL139C</i> | 1.380                                | 1.055                    | 1.2E-66 |
| <i>RCO1-GFP</i>    | <i>YMR075W</i> | 0.325                                | 0.301                    | 1.1E-03 | <i>IES1-GFP</i>  | <i>YFL013C</i> | 1.381                                | 0.290                    | 7.5E-24 |
| <i>NUP100-GFP</i>  | <i>YKL068W</i> | 0.339                                | 0.248                    | 1.3E-36 | <i>HDA3-GFP</i>  | <i>YPR179C</i> | 1.584                                | 0.597                    | 5.3E-49 |
| <i>PEX3-GFP</i>    | <i>YDR329C</i> | 0.405                                | 0.743                    | 3.9E-02 | <i>AIM4-GFP</i>  | <i>YBR194W</i> | 1.585                                | 0.655                    | 4.1E-02 |
| <i>SAS4-GFP</i>    | <i>YDR181C</i> | 0.413                                | 1.987                    | 4.3E-02 | <i>HST1-GFP</i>  | <i>YOL068C</i> | 1.615                                | 1.890                    | 4.5E-50 |
| <i>NUP2-GFP</i>    | <i>YLR335W</i> | 0.441                                | 0.114                    | 4.6E-18 | <i>NUP53-GFP</i> | <i>YDL088C</i> | 1.623                                | 2.957                    | 1.7E-10 |
| <i>SPT7-GFP</i>    | <i>YBR081C</i> | 0.532                                | 1.758                    | 1.5E-61 | <i>SWI3-GFP</i>  | <i>YJL176C</i> | 1.663                                | 1.046                    | 4.2E-80 |
| <i>ISW1-GFP</i>    | <i>YBR245C</i> | 0.553                                | 1.250                    | 2.2E-02 | <i>UBP8-GFP</i>  | <i>YMR223W</i> | 1.681                                | 0.419                    | 2.4E-02 |
| <i>PIP2-GFP</i>    | <i>YOR363C</i> | 0.587                                | 0.596                    | 7.2E-24 | <i>IES3-GFP</i>  | <i>YLR052W</i> | 1.793                                | 1.606                    | 1.5E-15 |
| <i>NAT4-GFP</i>    | <i>YMR069W</i> | 0.653                                | 1.637                    | 2.6E-53 | <i>SNT1-GFP</i>  | <i>YCR033W</i> | 1.804                                | 0.636                    | 1.6E-12 |
| <i>KAP120-GFP</i>  | <i>YPL125W</i> | 0.668                                | 1.158                    | 4.0E-31 | <i>IOC2-GFP</i>  | <i>YLR095C</i> | 1.883                                | 0.652                    | 1.0E-04 |
| <i>MAK3-GFP</i>    | <i>YPR051W</i> | 0.683                                | 1.510                    | 1.6E-07 | <i>SET3-GFP</i>  | <i>YKR029C</i> | 2.004                                | 1.511                    | 9.7E-16 |

| Strain            |                  | Mean<br>Doubling<br>Time<br>Increase | Doubling<br>Time<br>SDEV | P-Val   | Strain           |                | Mean<br>Doubling<br>Time<br>Increase | Doubling<br>Time<br>SDEV | P-Val   |
|-------------------|------------------|--------------------------------------|--------------------------|---------|------------------|----------------|--------------------------------------|--------------------------|---------|
| <i>CHZ1-GFP</i>   | <i>YER030W</i>   | 2.006                                | 0.959                    | 7.2E-09 | <i>SDS3-GFP</i>  | <i>YIL084C</i> | 2.920                                | 2.550                    | 1.9E-02 |
| <i>NUP170-GFP</i> | <i>YBL079W</i>   | 2.062                                | 0.738                    | 2.0E-08 | <i>SWD3-GFP</i>  | <i>YBR175W</i> | 3.017                                | 2.390                    | 5.9E-03 |
| <i>HTL1-GFP</i>   | <i>YCR020W-B</i> | 2.063                                | 1.546                    | 9.1E-54 | <i>TAF14-GFP</i> | <i>YPL129W</i> | 3.058                                | 1.181                    | 4.8E-02 |
| <i>SNF2-GFP</i>   | <i>YOR290C</i>   | 2.091                                | 1.500                    | 1.8E-17 | <i>SIF2-GFP</i>  | <i>YBR103W</i> | 3.255                                | 0.989                    | 2.3E-04 |
| <i>SPT20-GFP</i>  | <i>YOL148C</i>   | 2.276                                | 1.150                    | 3.4E-99 | <i>PAF1-GFP</i>  | <i>YBR279W</i> | 3.321                                | 0.627                    | 2.2E-11 |
| <i>BRE2-GFP</i>   | <i>YLR015W</i>   | 2.311                                | 1.719                    | 3.7E-02 | <i>SNF5-GFP</i>  | <i>YBR289W</i> | 3.384                                | 3.158                    | 1.6E-30 |
| <i>SWC5-GFP</i>   | <i>YBR231C</i>   | 2.344                                | 1.867                    | 2.8E-02 | <i>SAP30-GFP</i> | <i>YMR263W</i> | 3.482                                | 2.152                    | 3.0E-03 |
| <i>VPS71-GFP</i>  | <i>YML041C</i>   | 2.376                                | 2.383                    | 5.7E-04 | <i>SAS2-GFP</i>  | <i>YMR127C</i> | 3.518                                | 1.641                    | 5.5E-42 |
| <i>NUP133-GFP</i> | <i>YKR082W</i>   | 2.421                                | 1.157                    | 3.7E-03 | <i>SNF12-GFP</i> | <i>YNR023W</i> | 4.084                                | 0.709                    | 1.5E-07 |
| <i>EAF5-GFP</i>   | <i>YEL018W</i>   | 2.532                                | 1.120                    | 4.0E-66 | <i>MDM20-GFP</i> | <i>YOL076W</i> | 4.545                                | 1.486                    | 1.9E-92 |
| <i>NTO1-GFP</i>   | <i>YPR031W</i>   | 2.548                                | 2.321                    | 9.6E-04 | <i>CDC73-GFP</i> | <i>YLR418C</i> | 5.254                                | 1.304                    | 3.9E-05 |
| <i>RTF1-GFP</i>   | <i>YGL244W</i>   | 2.629                                | 1.378                    | 6.2E-25 | <i>SNF6-GFP</i>  | <i>YHL025W</i> | 5.270                                | 0.543                    | 1.5E-60 |
| <i>YNG1-GFP</i>   | <i>YOR064C</i>   | 2.768                                | 1.554                    | 3.2E-02 | <i>RPD3-GFP</i>  | <i>YNL330C</i> | 11.697                               | 0.679                    | 1.2E-22 |
| <i>RAD6-GFP</i>   | <i>YGL058W</i>   | 2.882                                | 1.944                    | 3.6E-26 |                  |                |                                      |                          |         |
| <i>NUP188-GFP</i> | <i>YML103C</i>   | 2.884                                | 1.108                    | 6.2E-04 |                  |                |                                      |                          |         |
| <i>PHO23-GFP</i>  | <i>YNL097C</i>   | 2.919                                | 1.251                    | 2.4E-08 |                  |                |                                      |                          |         |

**Table 2: Deletion library strains with significant difference in doubling time over wild type**

| Strain          |                | Mean Doubling Time Increase | Doubling Time SDEV | P-Val   | Strain         |                | Mean Doubling Time Increase | Doubling Time SDEV | P-Val   |
|-----------------|----------------|-----------------------------|--------------------|---------|----------------|----------------|-----------------------------|--------------------|---------|
| <i>snl1Δ</i>    | <i>YIL016W</i> | -7.92                       | 0.16               | 8.4E-17 | <i>sap30Δ</i>  | <i>YMR263W</i> | 2.42                        | 1.62               | 3.0E-03 |
| <i>cdc73Δ</i>   | <i>YLR418C</i> | -3.41                       | 1.26               | 3.9E-05 | <i>gfd1Δ</i>   | <i>YMR255W</i> | 2.49                        | 0.40               | 2.0E-03 |
| <i>asf1Δ</i>    | <i>YJL115W</i> | -3.34                       | 2.19               | 7.4E-05 | <i>nto1Δ</i>   | <i>YPR031W</i> | 2.69                        | 0.95               | 9.6E-04 |
| <i>nat5Δ</i>    | <i>YOR253W</i> | -3.14                       | 1.35               | 1.4E-04 | <i>hos3Δ</i>   | <i>YPL116W</i> | 2.69                        | 1.99               | 1.1E-03 |
| <i>rad54Δ</i>   | <i>YGL163C</i> | -2.65                       | 0.99               | 1.1E-03 | <i>rco1Δ</i>   | <i>YMR075W</i> | 2.71                        | 2.09               | 1.0E-03 |
| <i>swr1Δ</i>    | <i>YDR334W</i> | -2.65                       | 0.12               | 1.0E-03 | <i>nup188Δ</i> | <i>YML103C</i> | 2.79                        | 0.89               | 6.2E-04 |
| <i>rxt3Δ</i>    | <i>YDL076C</i> | -2.46                       | 0.67               | 2.3E-03 | <i>vps71Δ</i>  | <i>YML041C</i> | 2.87                        | 2.14               | 5.6E-04 |
| <i>dyn2Δ</i>    | <i>YDR424C</i> | -2.04                       | 0.80               | 1.1E-02 | <i>sif2Δ</i>   | <i>YBR103W</i> | 3.04                        | 1.50               | 2.2E-04 |
| <i>acs1Δ</i>    | <i>YAL054C</i> | -2.02                       | 1.66               | 1.3E-02 | <i>loc2Δ</i>   | <i>YLR095C</i> | 3.22                        | 1.36               | 1.0E-04 |
| <i>kap123Δ</i>  | <i>YER110C</i> | -1.72                       | 0.39               | 3.0E-02 | <i>hos4Δ</i>   | <i>YIL112W</i> | 3.69                        | 1.73               | 1.1E-05 |
| <i>sas4Δ</i>    | <i>YDR181C</i> | -1.61                       | 0.45               | 4.2E-02 | <i>snf2Δ</i>   | <i>YOR290C</i> | 4.19                        | 2.18               | 1.8E-17 |
| <i>swc5Δ</i>    | <i>YBR231C</i> | 0.97                        | 1.91               | 2.7E-02 | <i>spp1Δ</i>   | <i>YPL138C</i> | 4.41                        | 2.31               | 2.3E-16 |
| <i>ypr174Δc</i> | <i>Ypr174c</i> | 1.03                        | 1.32               | 3.1E-02 | <i>lge1Δ</i>   | <i>YPL055C</i> | 4.42                        | 1.17               | 2.1E-07 |
| <i>yng1Δ</i>    | <i>YOR064C</i> | 1.56                        | 6.11               | 3.2E-02 | <i>mak3Δ</i>   | <i>YPRO51W</i> | 4.46                        | 0.94               | 1.6E-07 |
| <i>nhp10Δ</i>   | <i>YDL002C</i> | 1.59                        | 0.57               | 4.6E-02 | <i>snf12Δ</i>  | <i>YNR023W</i> | 4.49                        | 1.34               | 1.4E-07 |
| <i>taf14Δ</i>   | <i>YPL129W</i> | 1.59                        | 1.24               | 4.7E-02 | <i>nup60Δ</i>  | <i>YAR002W</i> | 4.53                        | 0.58               | 9.7E-08 |
| <i>pex3Δ</i>    | <i>YDR329C</i> | 1.66                        | 1.21               | 3.8E-02 | <i>nup170Δ</i> | <i>YBL079W</i> | 4.81                        | 0.49               | 2.0E-08 |
| <i>aim4Δ</i>    | <i>YBR194W</i> | 1.67                        | 2.16               | 4.0E-02 | <i>pho23Δ</i>  | <i>YNL097C</i> | 4.83                        | 1.46               | 2.3E-08 |
| <i>bre2Δ</i>    | <i>YLR015W</i> | 1.68                        | 1.48               | 3.7E-02 | <i>chz1Δ</i>   | <i>YER030W</i> | 5.06                        | 1.67               | 7.1E-09 |
| <i>ubp8Δ</i>    | <i>YMR223W</i> | 1.80                        | 0.34               | 2.4E-02 | <i>itc1Δ</i>   | <i>YGL133W</i> | 5.49                        | 0.87               | 3.9E-10 |
| <i>hos2Δ</i>    | <i>YGL194C</i> | 1.83                        | 0.72               | 2.2E-02 | <i>paf1Δ</i>   | <i>YBR279W</i> | 5.97                        | 0.90               | 2.2E-11 |
| <i>isw1Δ</i>    | <i>YBR245C</i> | 1.83                        | 0.66               | 2.1E-02 | <i>snt1Δ</i>   | <i>YCR033W</i> | 6.59                        | 2.49               | 1.5E-12 |
| <i>sds3Δ</i>    | <i>YIL084C</i> | 1.87                        | 0.52               | 1.9E-02 | <i>asm4Δ</i>   | <i>YDL088C</i> | 6.94                        | 8.51               | 1.6E-10 |
| <i>sum1Δ</i>    | <i>YDR310C</i> | 2.11                        | 2.09               | 1.0E-02 | <i>set3Δ</i>   | <i>YKR029C</i> | 7.55                        | 0.52               | 9.7E-16 |
| <i>sgf73Δ</i>   | <i>YGL066W</i> | 2.21                        | 2.44               | 7.5E-03 | <i>ies3Δ</i>   | <i>YLR052W</i> | 7.57                        | 1.53               | 1.5E-15 |
| <i>swd3Δ</i>    | <i>YBR175W</i> | 2.33                        | 3.05               | 5.8E-03 | <i>swc3Δ</i>   | <i>YAL011W</i> | 7.82                        | 2.89               | 1.5E-15 |
| <i>nup133Δ</i>  | <i>YKR082W</i> | 2.34                        | 0.62               | 3.6E-03 | <i>nup2Δ</i>   | <i>YLR335W</i> | 8.41                        | 0.77               | 4.5E-18 |

| Strain         |         | Mean Doubling Time Increase | Doubling Time SDEV | P-Val   | Strain        |           | Mean Doubling Time Increase | Doubling Time SDEV | P-Val   |
|----------------|---------|-----------------------------|--------------------|---------|---------------|-----------|-----------------------------|--------------------|---------|
| <i>leo1Δ</i>   | YOR123C | 8.45                        | 0.85               | 3.7E-18 | <i>hst1Δ</i>  | YOL068C   | 23.95                       | 2.62               | 4.5E-50 |
| <i>gcn5Δ</i>   | YGR252W | 8.47                        | 1.63               | 5.9E-18 | <i>nup84Δ</i> | YDL116W   | 24.82                       | 1.41               | 1.8E-52 |
| <i>sir3Δ</i>   | YLR442C | 9.99                        | 0.36               | 2.2E-22 | <i>htl1Δ</i>  | YCRO20W-B | 25.90                       | 1.86               | 9.1E-54 |
| <i>rpd3Δ</i>   | YNL330C | 10.20                       | 1.39               | 1.1E-22 | <i>nat4Δ</i>  | YMR069W   | 26.32                       | 2.95               | 2.5E-53 |
| <i>pip2Δ</i>   | YOR363C | 10.58                       | 0.76               | 7.2E-24 | <i>eaf5Δ</i>  | YEL018W   | 28.32                       | 6.34               | 4.0E-66 |
| <i>ies1Δ</i>   | YFL013C | 11.08                       | 3.03               | 7.5E-24 | <i>spt7Δ</i>  | YBR081C   | 36.15                       | 5.62               | 1.5E-61 |
| <i>hda2Δ</i>   | YDR295C | 11.16                       | 2.81               | 3.0E-24 | <i>ume1Δ</i>  | YPL139C   | 39.04                       | 4.49               | 1.2E-66 |
| <i>rtf1Δ</i>   | YGL244W | 11.52                       | 3.02               | 6.2E-25 | <i>eaf7Δ</i>  | YNL136W   | 41.02                       | 13.45              | 1.4E-50 |
| <i>rad6Δ</i>   | YGL058W | 11.96                       | 2.83               | 3.5E-26 | <i>dot1Δ</i>  | YDR440W   | 41.67                       | 4.65               | 5.4E-69 |
| <i>kap120Δ</i> | YPL125W | 13.76                       | 1.97               | 3.9E-31 | <i>swi3Δ</i>  | YJL176C   | 54.40                       | 4.50               | 4.1E-80 |
| <i>nup100Δ</i> | YKL068W | 16.68                       | 2.95               | 1.2E-36 | <i>spt20Δ</i> | YOL148C   | 73.09                       | 8.36               | 3.4E-99 |
| <i>sas2Δ</i>   | YMR127C | 20.44                       | 4.35               | 5.5E-42 | <i>snf6Δ</i>  | YHL025W   | 85.92                       | 24.82              | 1.4E-60 |
| <i>ngg1Δ</i>   | YDR176W | 21.17                       | 2.52               | 1.4E-45 | <i>snf5Δ</i>  | YBR289W   | 101.28                      | 70.92              | 1.6E-30 |
| <i>kap122Δ</i> | YGL016W | 22.07                       | 4.32               | 8.3E-45 | <i>mdm20Δ</i> | YOL076W   | 101.37                      | 10.87              | 1.9E-92 |
| <i>hda3Δ</i>   | YPR179C | 22.77                       | 1.66               | 5.3E-49 |               |           |                             |                    |         |

**Supplementary Table 1 All strains investigated in this study.**

| Strain | Strain     | Strain | Strain     | Strain | Strain     | Strain | Strain     |
|--------|------------|--------|------------|--------|------------|--------|------------|
| Common | Systematic | Common | Systematic | Common | Systematic | Common | Systematic |
| Name   | Name       | Name   | Name       | Name   | Name       | Name   | Name       |
| Acs1   | YAL054C    | Hst2   | YPL015C    | Nup133 | YKR082W    | Shg1   | YBR258C    |
| Adr1   | YDR216W    | Hst4   | YDR191W    | Nup170 | YBL079W    | Sif2   | YBR103W    |
| Ahc1   | YOR023C    | Htl1   | YCR020W-B  | Nup188 | YML103C    | Sin3   | YOL004W    |
| Aim4   | YBR194W    | Htz1   | YOL012C    | Nup2   | YLR335W    | Sir3   | YLR442C    |
| Arp5   | YNL059C    | Ies1   | YFL013C    | Nup53  | YMR153W    | Sir4   | YDR227W    |
| Arp6   | YLR085C    | Ies3   | YLR052W    | NUP60  | YAR002W    | Snf11  | YDR073W    |
| Asf1   | YJL115W    | loc2   | YLR095C    | NUP84  | YDL116W    | Snf12  | YNR023W    |
| Bre1   | YDL074C    | loc3   | YFR013W    | Oaf3   | YKR064W    | Snf2   | YOR290C    |
| Bre2   | YLR015W    | loc4   | YMR044W    | Paf1   | YBR279W    | Snf5   | YBR289W    |
| Cdc73  | YLR418C    | lsw1   | YBR245C    | Pex3   | YDR329C    | Snf6   | YHL025W    |
| Chd1   | YER164W    | lsw2   | YOR304W    | Pho23  | YNL097C    | Snl1   | YIL016W    |
| Chz1   | YER030W    | ltc1   | YGL133W    | Pip2   | YOR363C    | Snt1   | YCR033W    |
| Dot1   | YDR440W    | Kap114 | YGL241W    | Pml39  | YML107C    | Spp1   | YPL138C    |
| Dyn2   | YDR424C    | Kap120 | YPL125W    | Pom152 | YMR129W    | Spt20  | YOL148C    |
| Eaf3   | YPR023C    | Kap122 | YGL016W    | Pom34  | YLR018C    | Spt3   | YDR392W    |
| Eaf5   | YEL018W    | Kap123 | YER110C    | Rad54  | YGL163C    | Spt7   | YBR081C    |
| Eaf6   | YJR082C    | Leo1   | YOR123C    | Rad6   | YGL058W    | Sum1   | YDR310C    |
| Eaf7   | YNL136W    | Lge1   | YPL055C    | Rco1   | YMR075W    | Swc3   | YAL011W    |
| Esc1   | YMR219W    | Mad1   | YGL086W    | Rpd3   | YNL330C    | Swc5   | YBR231C    |
| Fpr4   | YLR449W    | Mad2   | YJL030W    | Rph1   | YER169W    | Swd1   | YAR003W    |
| Gcn5   | YGR252W    | Mak10  | YEL053C    | Rsc2   | YLR357W    | Swd3   | YBR175W    |
| Gfd1   | YMR255W    | Mak3   | YPR051W    | Rtf1   | YGL244W    | Swi3   | YJL176C    |
| Gis1   | YDR096W    | Mdm20  | YOL076W    | Rxt2   | YBR095C    | Swr1   | YDR334W    |
| Gtt3   | YEL017W    | Mip6   | YHR015W    | Rxt3   | YDL076C    | Taf14  | YPL129W    |
| Hda1   | YNL021W    | Mlp1   | YKR095W    | Sap30  | YMR263W    | Ubp8   | YMR223W    |
| Hda2   | YDR295C    | Mlp2   | YIL149C    | Sas2   | YMR127C    | Uip3   | YAR027W    |
| Hda3   | YPR179C    | Nap1   | YKR048C    | Sas3   | YBL052C    | Ume1   | YPL139C    |
| Hfi1   | YPL254W    | Nat1   | YDL040C    | Sas4   | YDR181C    | Ume6   | YDR207C    |

|      |         |        |         |       |         |         |         |
|------|---------|--------|---------|-------|---------|---------|---------|
| Hos2 | YGL194C | Nat3   | YPR131C | Sas5  | YOR213C | Vps71   | YML041C |
| Hos3 | YPL116W | Nat4   | YMR069W | Sdc1  | YDR469W | Vps72   | YDR485C |
| Hos4 | YIL112W | Nat5   | YOR253W | Sds3  | YIL084C | Vps75   | YNL246W |
| Hpa3 | YEL066W | Ngg1   | YDR176W | Set2  | YJL168C | Yaf9    | YNL107W |
| Hsl7 | YBR133C | Nhp10  | YDL002C | Set3  | YKR029C | Ydl089w | Ydl089w |
| Hst1 | YOL068C | Nto1   | YPR031W | Sgf11 | YPL047W | Yng1    | YOR064C |
|      |         | Nup100 | YKL068W | Sgf73 | YGL066W | Ypr174c | Ypr174c |
